# Supplementary material for: Multi-dimensional data integration algorithm based on random walk with restart
Source: PubMed Central journal article supplement (PMC7912853; doi:10.1186/s12859-021-04029-3), 2021-02-27
Supplement: 12859_2021_4029_MOESM1_ESM.pdf [file 12859_2021_4029_MOESM1_ESM.pdf]

## Cluster validity indexes

### Ratkowsky Lance index

The cluster number is determined by seven cluster validity indexes: Ratkowsky Lance, Tau, Silhouette, C-index, SD-scat, SD-Dis and Calinski-Harabasz. These indexes are introduced as follows:

Ratkowsky Lance index is based on this formula:

$$\frac{\bar{S}}{q^{1/2}}$$

The value of  $\bar{S}$  is equal to the average of the ratios of  $B/T$  where B stands for the sum of squares between the clusters for each variable and T for the total sum of squares for each variable.

The optimal number of clusters is that value of  $q$  for which  $\frac{\bar{S}}{q^{1/2}}$  has its maximum value. If the value of  $q$  is made constant, the Ratkowsky Lance criterion can be reduced from  $\frac{\bar{S}}{q^{1/2}}$  to  $\bar{S}$ .

### Tau index

Tau index is computed as follows:

$$Tau = \frac{s(+)-s(-)}{[(n_d(n_d-1)/2 - t)(n_d(n_d-1)/2)]^{1/2}}$$

where  $s(+)$  is the number of concordant comparisons.  $s(-)$  is the number of discordant comparisons.  $n_d$  is the total number of distances (which is the same as the total number of observations or objects under study).  $t$  is the number of comparisons

of two pairs of points where both pairs represent within cluster comparisons or both pairs are between cluster comparisons.

### **Silhouette**

The silhouette value is a measure of how well each object lies within its cluster. The silhouette value has a value between -1 and 1, and should be maximized. It is calculated as follows:

$$S(i) = \frac{b_i - a_i}{\max(b_i, a_i)}$$

where  $a_i$  is the average distance between sample  $i$  and all other data within the same cluster,  $b_i$  is the lowest average distance of sample  $i$  to all points in any other cluster.

### **C-index**

C-index is measures of between-cluster isolation and within-cluster coherence. It can be defined as

$$cindex = \frac{D_u - (r \times D_{min})}{(r \times D_{max}) - (r \times D_{min})}$$
$$D_{min} \neq D_{max}$$

$cindex \in (0,1)$ .  $D_u$  is the sum of all within-cluster dissimilarities.  $r$  is number of within-cluster dissimilarities.  $D_{min}$  smallest within-cluster dissimilarity.  $D_{max}$  largest within-cluster dissimilarity. The value of  $q$  (the number of clusters) which minimizes  $cindex$  is considered as specifying the number of clusters.

## SD-scat

SD-scat is the average scattering of the clusters which is a measure of compactness of the clusters, defined as

$$Scat(q) = \frac{1}{q} \sum_{k=1}^q \|\sigma(c_k)\| / \|\sigma(X)\|$$

where  $q$  is the number of clusters,  $\sigma(c_k)$  is the variance of cluster  $c_k$ ,  $\sigma(X)$  is the variance of data set  $X$ .  $|X| = (X^T X)^{1/2}$ , where  $X$  is a vector. The number of clusters,  $q$ , that minimizes the index can be considered as an optimal value for the number of clusters present in the data set.

## SD-Dis

SD-Dis evaluates the density of the area between the two clusters in relation to the density of the two clusters. Thus, it is a measure of the separation of the clusters, defined as

$$Dis(q) = \frac{D_{max}}{D_{min}} \sum_{k=1}^q \left( \sum_{z=1}^q \|c_k - c_z\| \right)^{-1}$$

where  $D_{max} = \max(\|c_k - c_z\|) \forall k, z \in \{1, 2, 3, \dots, q\}$  is the maximum distance between cluster centers.  $D_{min} = \min(\|c_k - c_z\|) \forall k, z \in \{1, 2, 3, \dots, q\}$  is the minimum distance between cluster centers. The number of clusters,  $q$ , that minimizes the index can be considered as an optimal value for the number of clusters present in the data set.

## Calinski-Harabasz index

The Calinski-Harabasz index

$$CH(q) = \frac{\text{trace}(B_q)/(q-1)}{\text{trace}(W_q)/(n-q)}$$

where  $W_q = \sum_{k=1}^q \sum_{i \in C_k} (x_i - c_k)(x_i - c_k)^T$  is the within-group dispersion matrix for data clustered into  $q$  clusters.  $B_q = \sum_{k=1}^q n_k * (c_k - c)(c_k - c)^T$  is the between-group dispersion matrix for data clustered into  $q$  clusters.  $x_i$  is  $p$ -dimensional vector of observations of the  $i^{th}$  object in cluster  $k$ .  $c_k$  is centroid of cluster  $k$ .  $c$  is centroid of data matrix.  $n_k$  is number of objects in cluster  $C_k$ . The value of  $q$ , which minimizes  $CH(q)$ , is considered as specifying the number of clusters.
