# Supplementary material for: Multi-dimensional data integration algorithm based on random walk with restart
Source: PubMed Central journal article supplement (PMC7912853; doi:10.1186/s12859-021-04029-3), 2021-02-27

**A**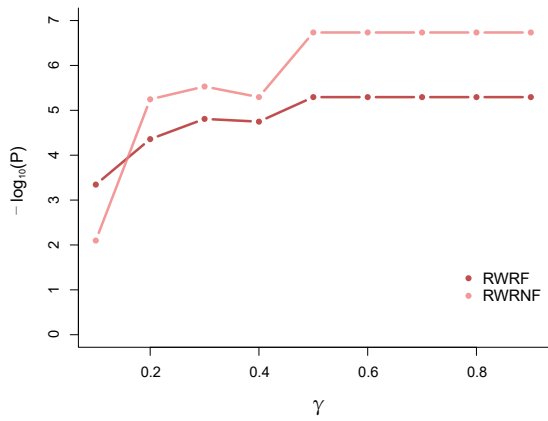**B**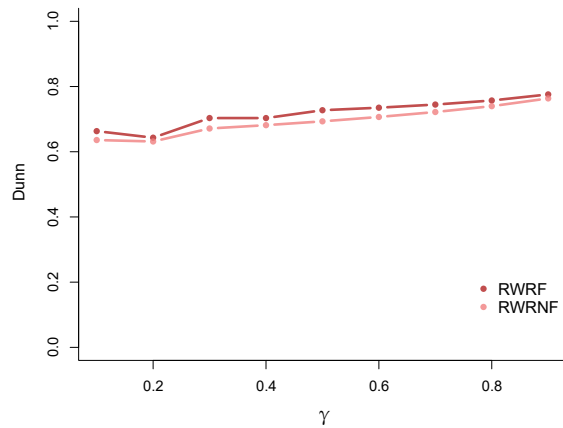

Supplement: 12859_2021_4029_MOESM6_ESM.pdf [file 12859_2021_4029_MOESM6_ESM.pdf]
